# Supplementary material for: Light-driven MOF-based micromotors with self-floating characteristics for water sterilization
Source: Royal Society of Chemistry journal article supplement (doi:10.1039/d3nr02299d), 2023-01-01
Supplement: d3nr02299d4.pdf [file d3nr02299d4.pdf]

## **Light-Driven MOFs-based Micromotors with Self-Floating Characteristics for Water Sterilization**

Hai Huang,<sup>a†</sup> Yu Zhao,<sup>a†</sup> Hao Wei Yang,<sup>a†</sup> Jie Li,<sup>a</sup> Yulong Ying,<sup>\*a</sup> Jinhua Li,<sup>\*b</sup> and Sheng Wang<sup>\*a</sup>

<sup>a</sup>School of Materials Science and Engineering, Zhejiang Sci-Tech University, Hangzhou, 310018, China.  
yingyulong@zstu.edu.cn; wangsheng571@hotmail.com

<sup>b</sup>School of Medical Technology, Beijing Institute of Technology, Beijing 100081, China  
[lijinhua@bit.edu.cn](mailto:lijinhua@bit.edu.cn)

† These authors contributed equally to this work.

**Supporting Information**

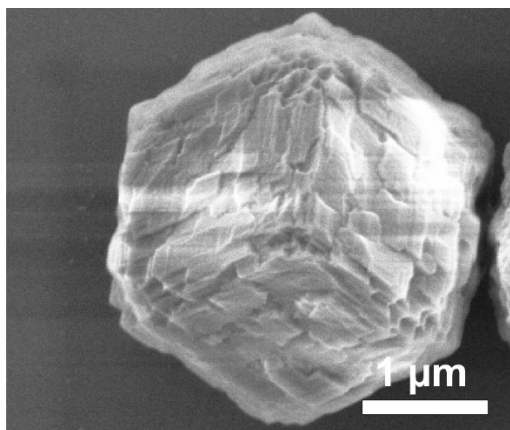

Fig. S1 SEM image of ZIF-8 microparticle.

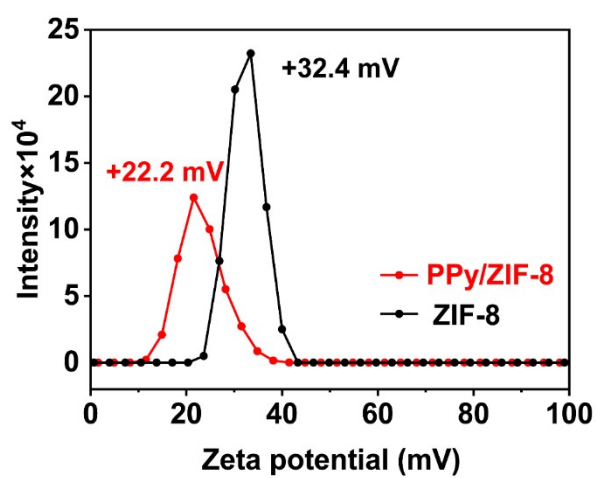

Fig. S2 Zeta potential of PPy/ZIF-8 and ZIF-8 microparticles at pH 7.0.

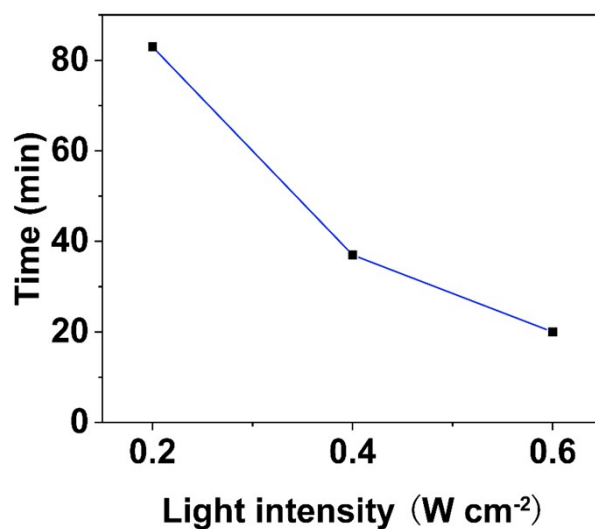

Fig. S3 The relationship between the intensity of blue light and the time required for PPy/ZIF-8 micromotors ( $1.5 \text{ mg mL}^{-1}$ ) to completely move to the top of the suspension.

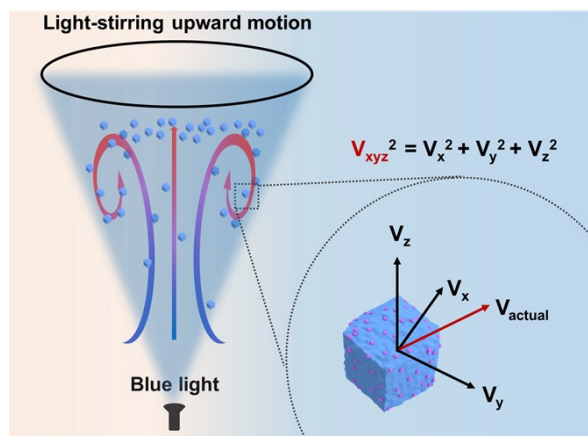

**Fig. S4** The motion speed calculation measurement of the MOFtors in the XY plane.

The average speed calculated in this work is the motion speed on the XY planes, i.e.,  $V_{xy}$ , due to the difficulty in the motion measurement in the Z direction (Fig. S4). In reality, the motion speed measurement of the micromotors should be in 3D space. Unfortunately, we could not perform it in our lab. For micron or submicron-sized motors, a conventional wide-field optical microscope is typically the primary instrument to visualize micro/nanomotors movement. However, the short depth-of-focus of the optical microscopy system, typically around 2-3  $\mu\text{m}$ , creates a trade-off between the magnification and the depth-of-focus. It can create a challenge when attempting to track the motion of MNMs with vertical movement, as they may quickly move out of the ideal focus plane, resulting in a defocused image. Thus, we test the motion speed of micromotors on a plane (XY plane), i.e.,  $V_{xy}$ , while the actual speed value of 3D motion should be larger according to the mathematic relationship (**Fig. S4**).
